# Supplementary material
Source: PubMed Central journal article supplement (PMC3682507)
Supplement: NIHMS228724-supplement-Suppl_Figures_1_thru_4.pdf [file NIHMS228724-supplement-Suppl_Figures_1_thru_4.pdf]

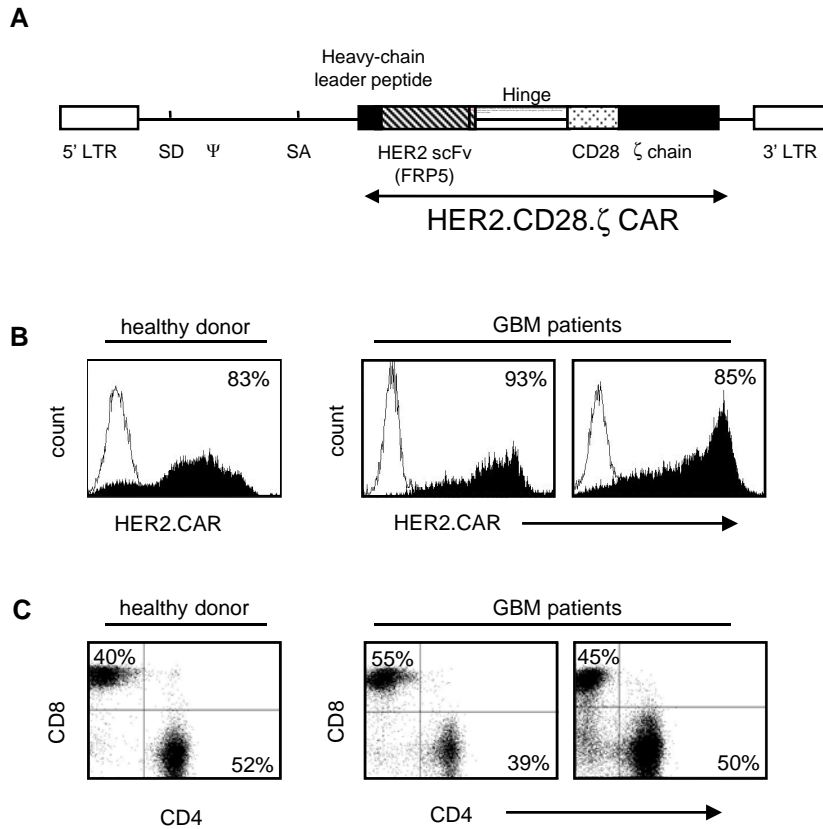

**Supplemental figure 1: Generation and characterization of GBM patients' HER2-specific T cells:** A. Schematic of the HER2-specific second generation CAR; B. The surface expression of the HER2 CARs transgene was determined as described in the materials and methods section. On average, 79% (SD +/-15%) of GBM patients' T cells expressed HER2-specific CAR, and (C) transduced cells contained CD4- and CD8-positive T cells. Transduction rates of GBM patients' T cells and their phenotype were similar to those of healthy donors.

A

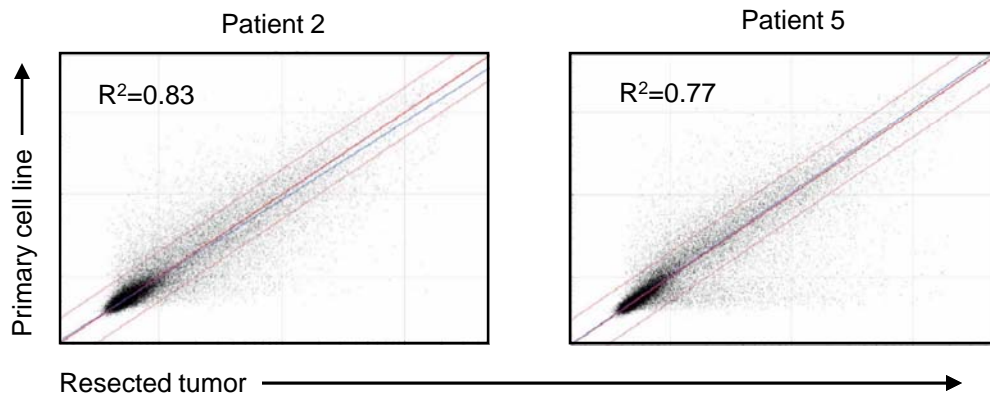

**Supplemental figure 2: Gene expression array of the primary cell line correlates with the parental tumor.** Scatter plots are shown for two representative patients demonstrate the correlations expressed as Pearson coefficient ( $r^2$ ) using all 48,000 probe signal intensity (Illumina, Inc.). Both axes are logarithmic. Red lines represent the identity line and 2 fold increase /decrease. Blue line represents the best fit.

Supplemental figure 2

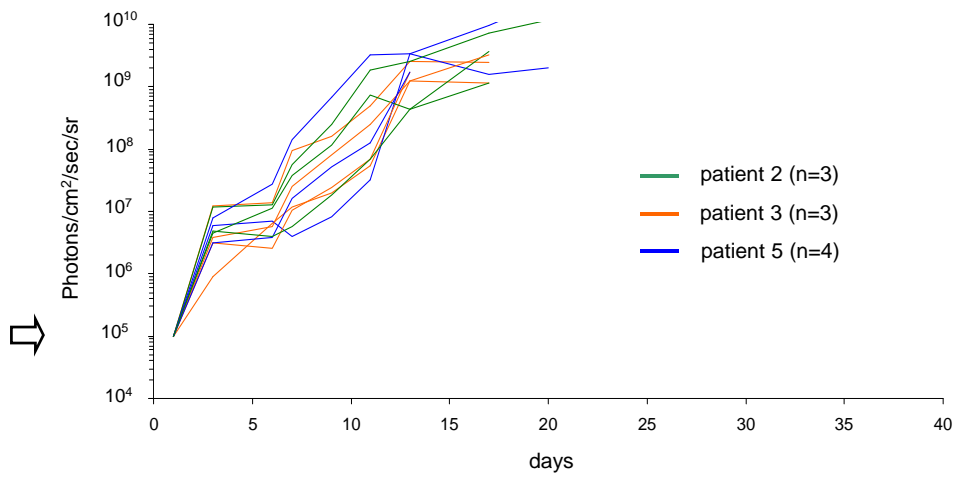

**Supplemental figure 4: Successful engraftment of GBM xenografts.**  $5 \times 10^4$  primary GBM cells expressing the eGFP.FFLuc gene from patients 2 (3 mice), 3 (3 mice) and 5 (4 mice) were injected stereotactically into the right hemisphere of 9 to 12 week old SCID mice. Bioluminescence imaging of tumor xenografts demonstrate the progressive exponential growth of tumors in all experimental animals. Animals had a median survival of 17 days (range 14-22)

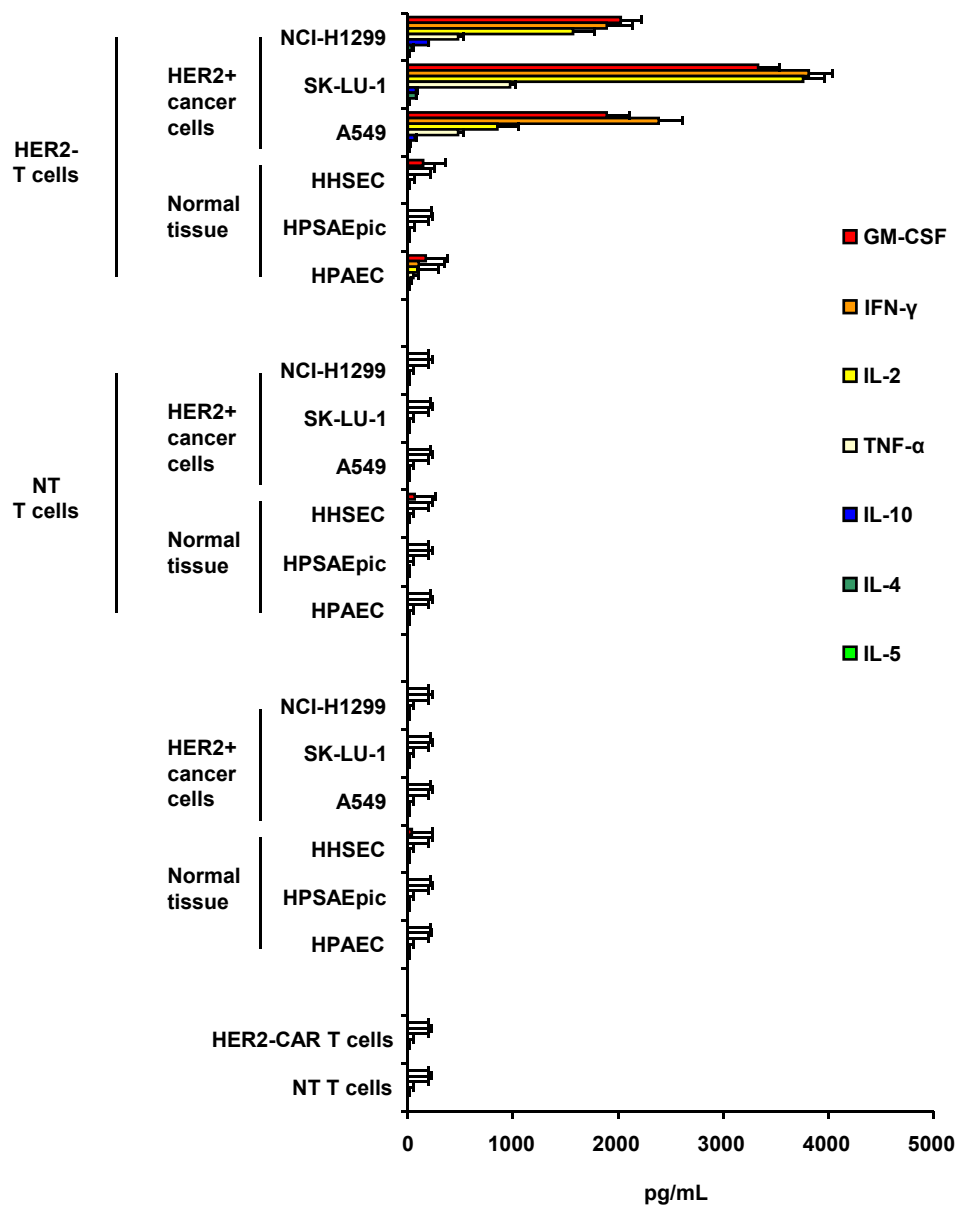

**Supplement Figure 4: HER2-specific T cells do not recognize primary endothelial and epithelial cells.** HER2-specific T cells (HER2-T cells) or nontransduced T cells (NT-T cells) were cocultured with HER2-positive cancer cell lines (NCI-H1299, SK-LU-1, A549), primary human hepatic sinusoidal endothelial cells (HHSEC), primary human small airway epithelial cells (HSAEpiC), or human pulmonary artery endothelial cells (HPAEC). \* After 18 hours the production of cytokines (GM-CSF, IFN- $\gamma$ , IL-2, TNF- $\alpha$ , IL-10, IL-4, IL-5) was determined by Multiplex analysis. Only HER2-positive lung cancer cells activated HER2-CAR T cells as judged by the production of GM-CSF, IFN- $\gamma$ , IL-2, TNF- $\alpha$  where as primary cells did not. In addition, unstimulated HER2-CAR T cells did not produce any cytokines. \* *HER2-positive cancer cell lines were obtained from American Type Culture Collection (ATCC; Manassas, VA ) and the primary cells from ScienCell™ (Carlsbad, CA).*
